# Supplementary material
Source: publisher figshare collection journal article supplement (https://springernature.figshare.com/ndownloader/files/18512099)
Supplement: Supplementary file [file 18512099]

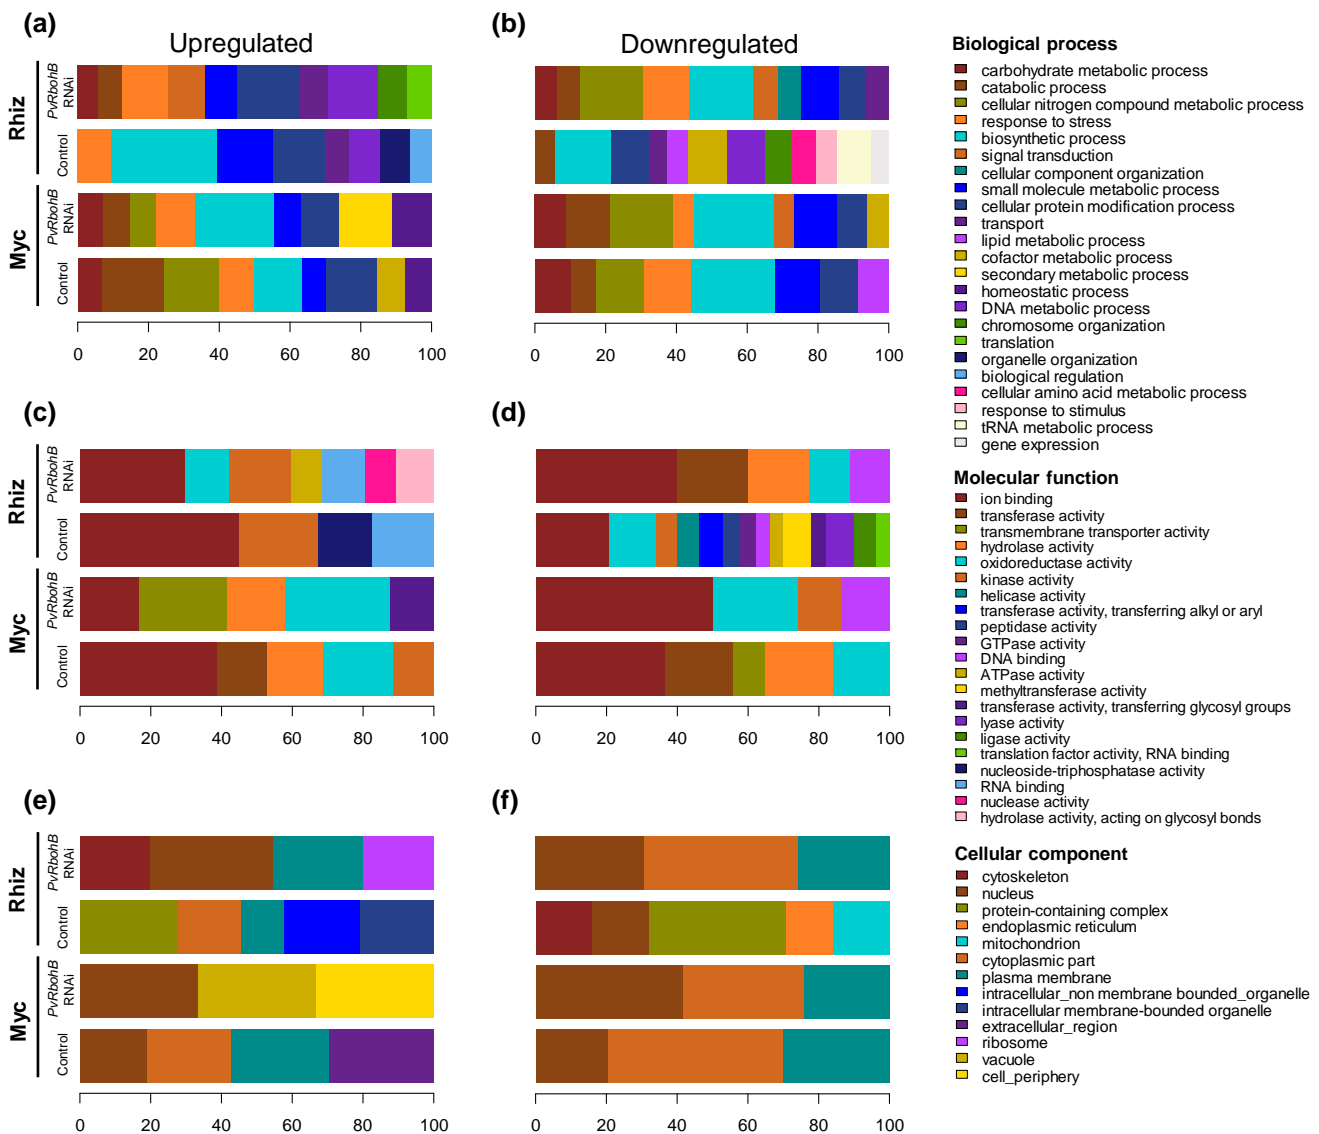

Figure S4 Functional annotation of the DEGs in rhizobia-inoculated and mycorrhizal *PvRbohB*-RNAi roots, relative to the control. The bars show the percentages of upregulated (**a, c, e**) and downregulated (**b, d, f**) DEGs annotated with GO terms of the functional categories of biological processes (**a–b**), molecular functions (**c–d**), and cellular components (**e–f**). A cutoff threshold of  $\text{Log}_2\text{FC} \geq 1.5$  and  $\text{P-adj/FDR} \leq 0.05$  was used, and GO terms were assigned using a GO-Slim analysis against the UniProt database in Blast2GO.
